# Supplementary figures and images for: Inhibition of Histone Demethylases LSD1 and UTX Regulates ERα Signaling in Breast Cancer
Source: MDPI journal article supplement (doi:10.3390/cancers11122027), 2019-12-16

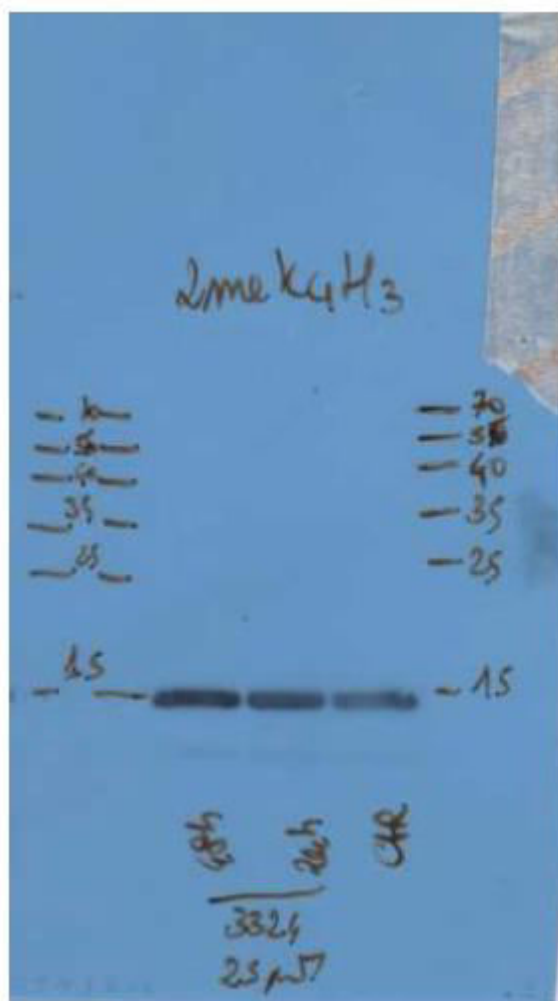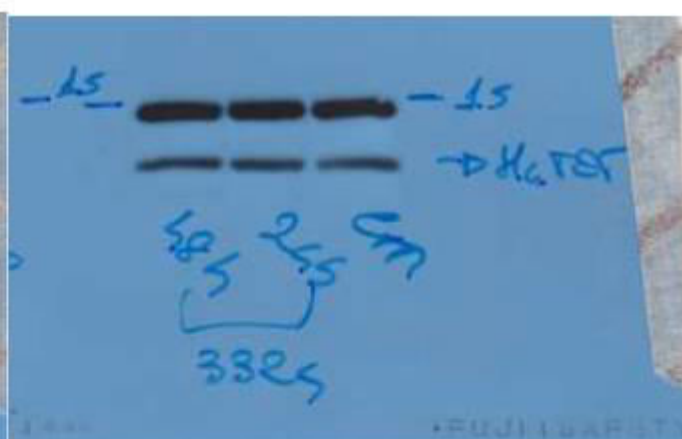



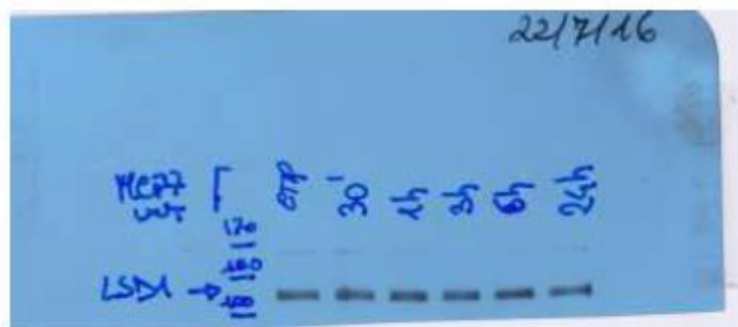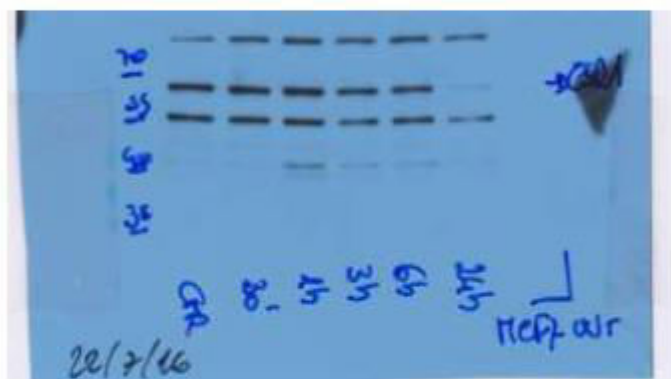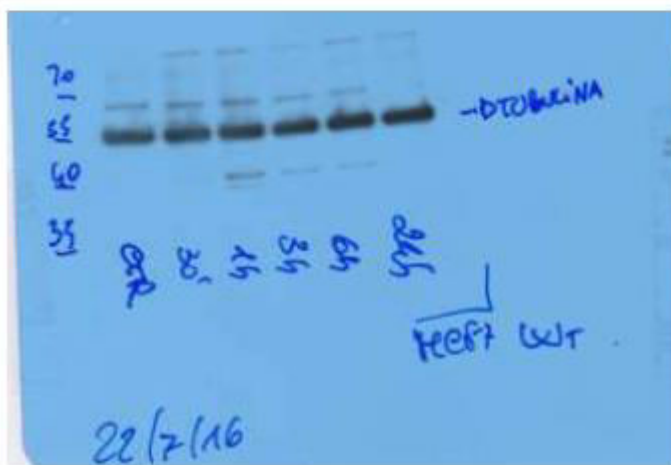

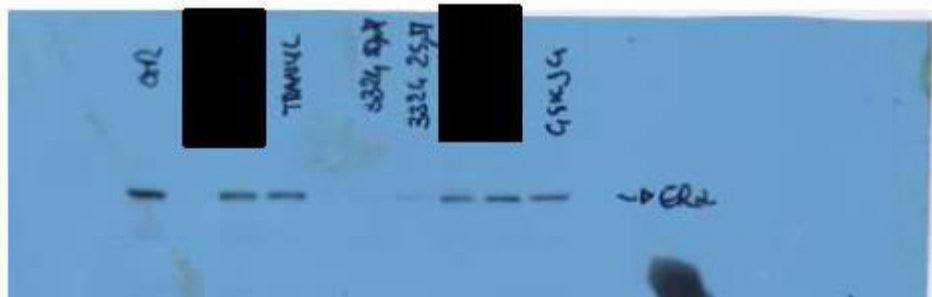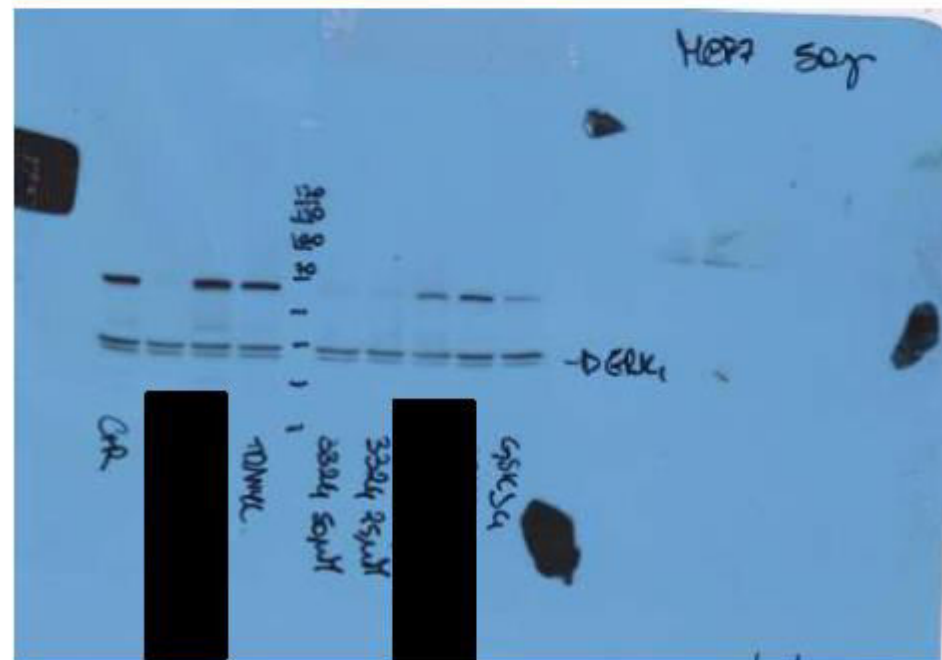





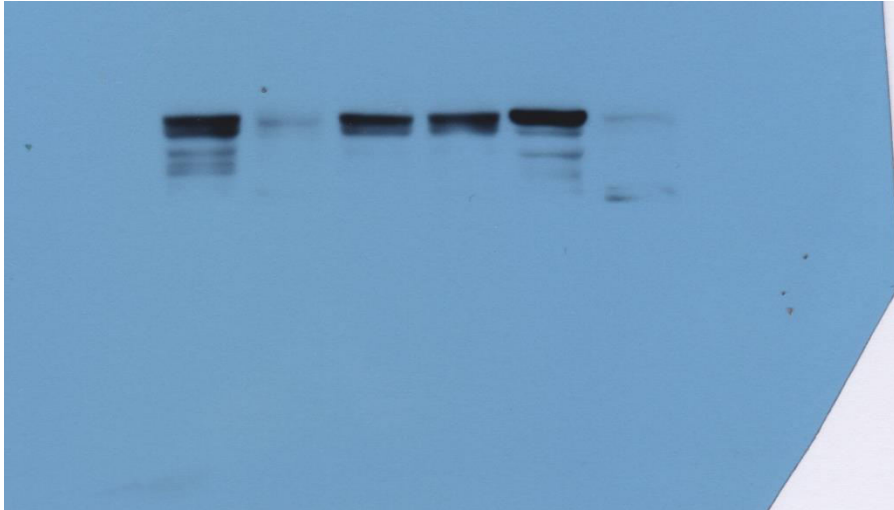

ER $\alpha$

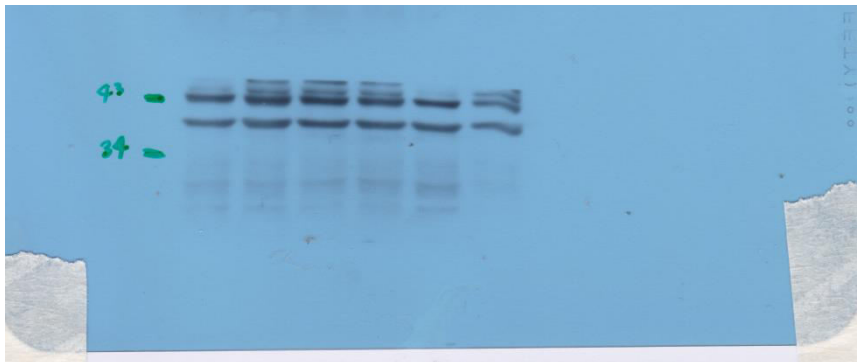

GAPDH

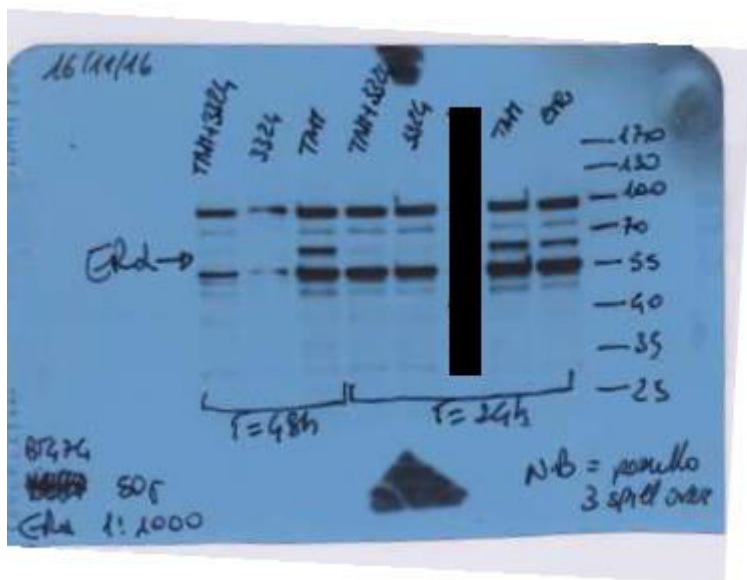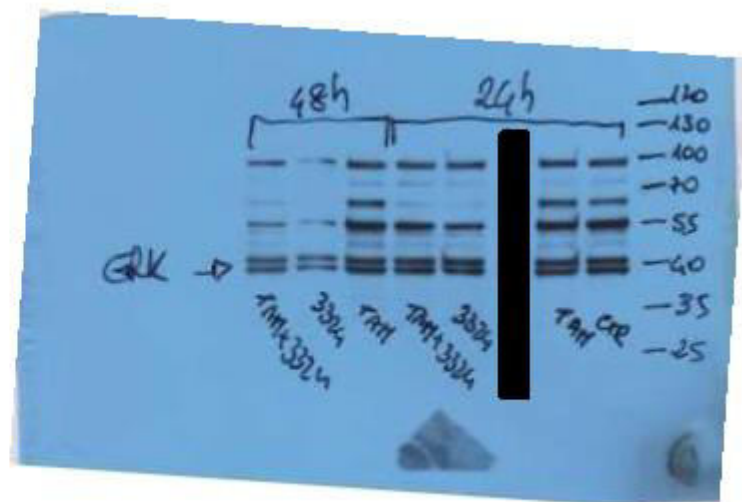

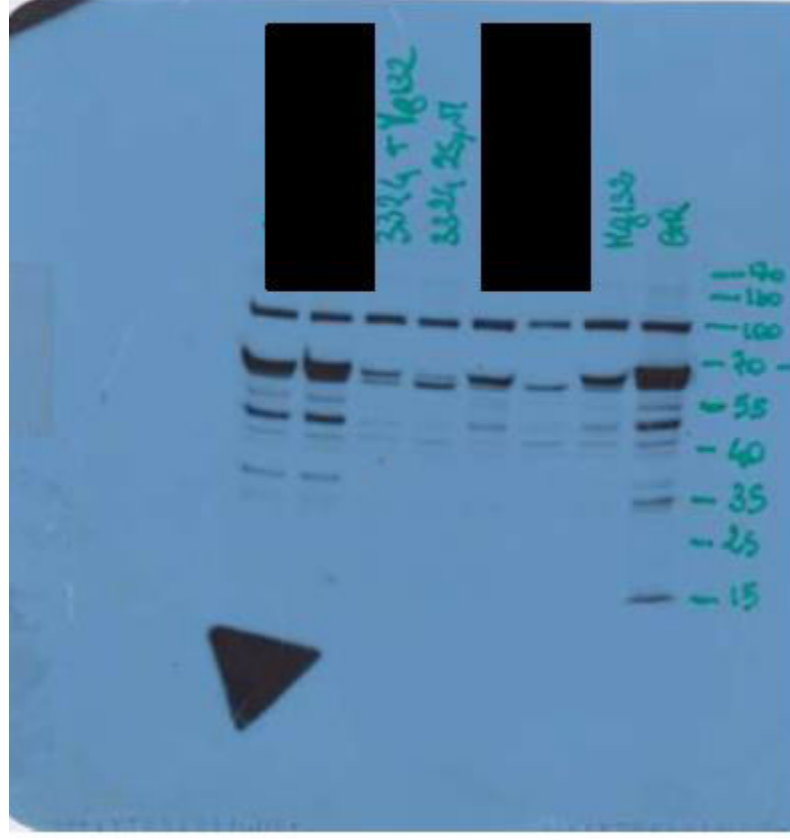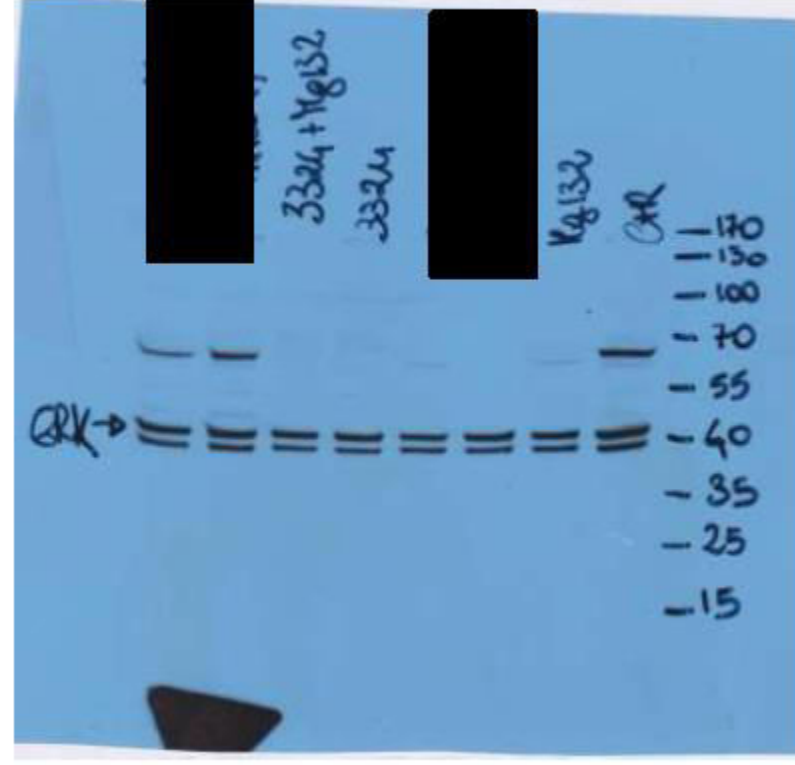

Ab: virginare 1:1000

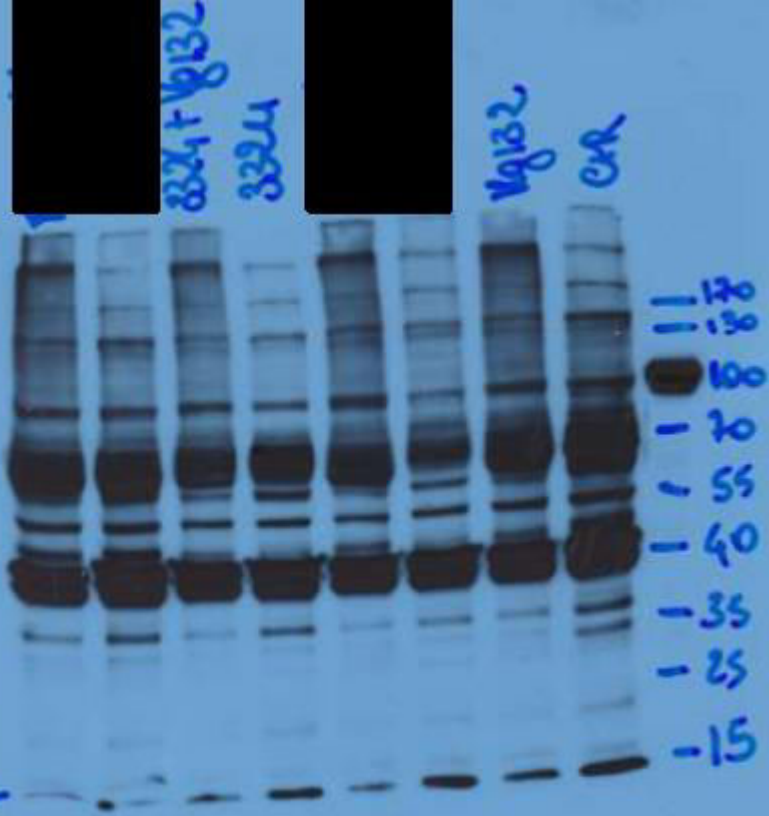

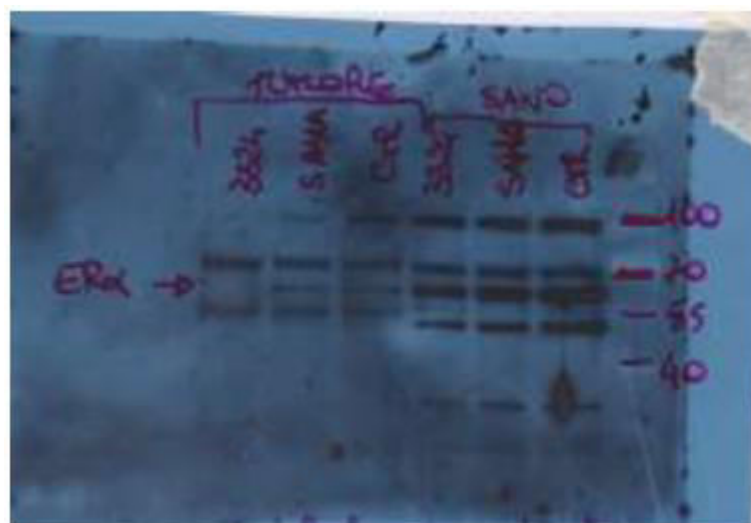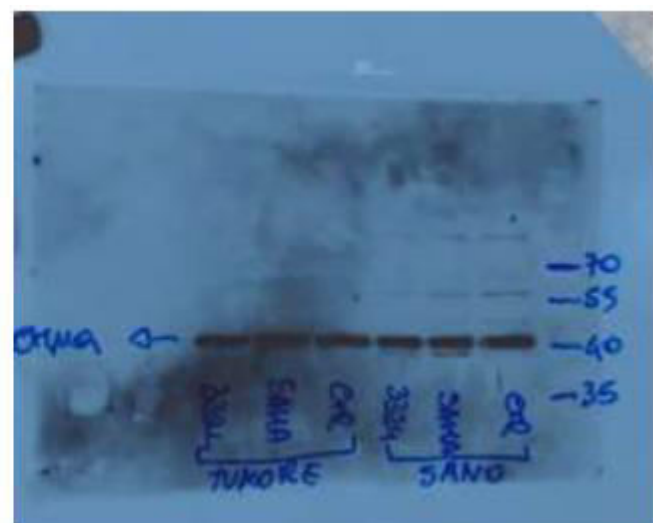

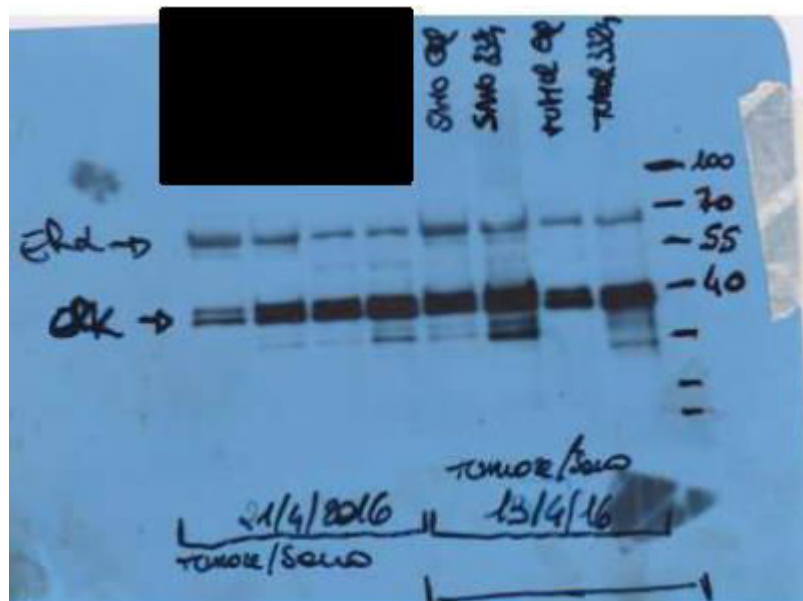

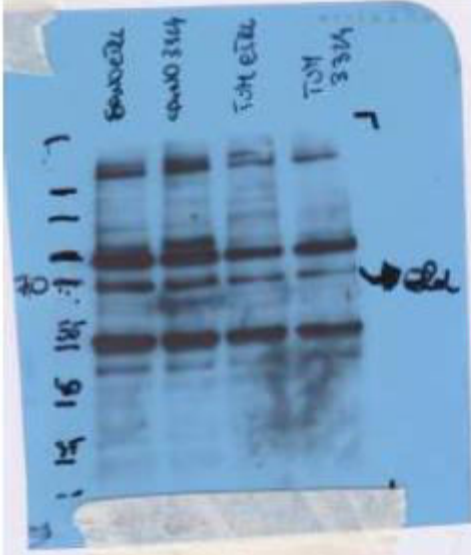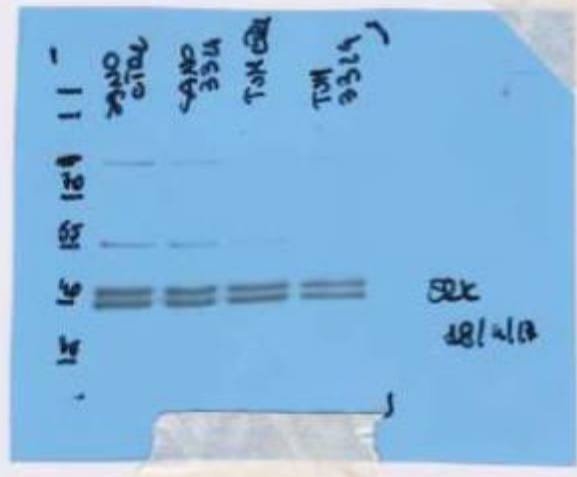

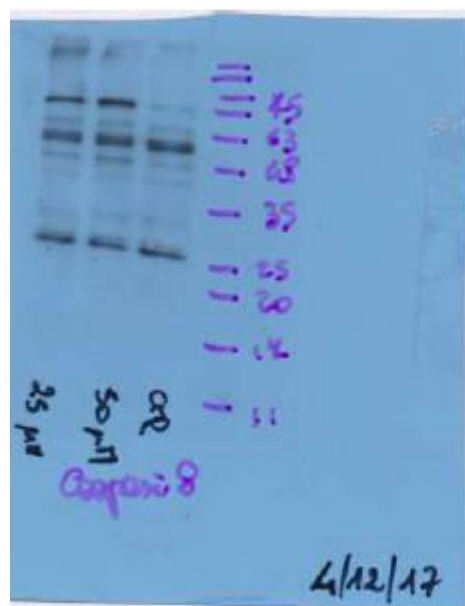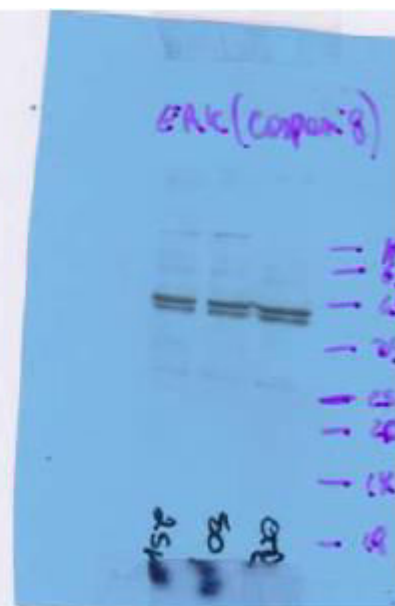

4/12/17

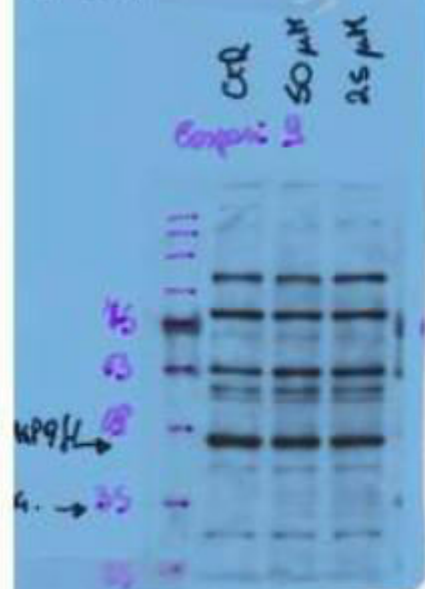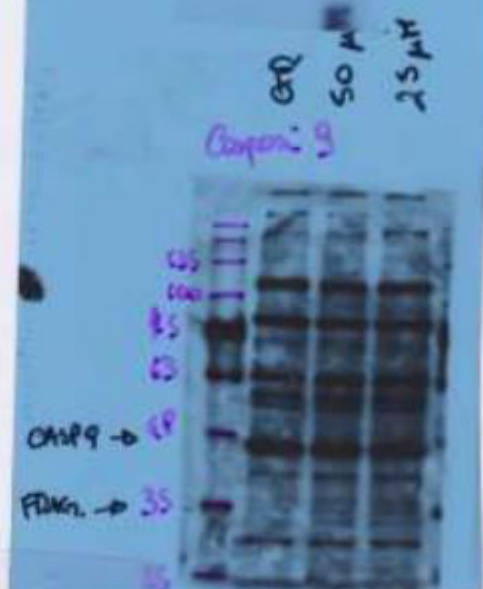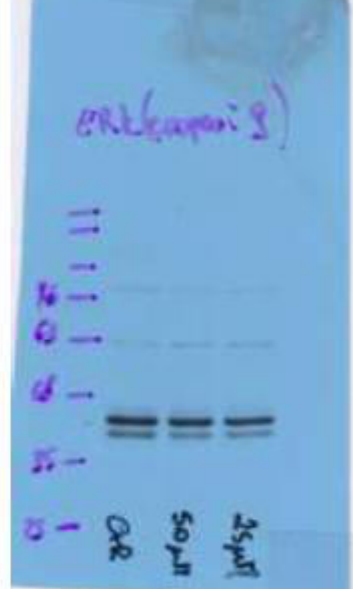

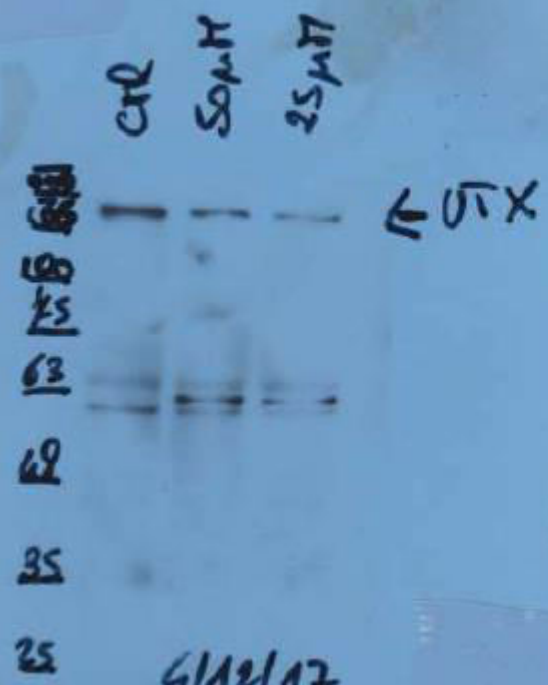

4/12/12

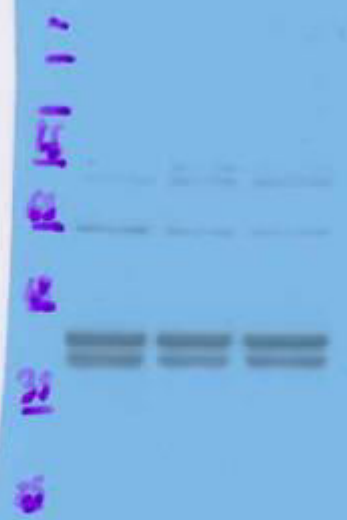

ERK1/2: UTX

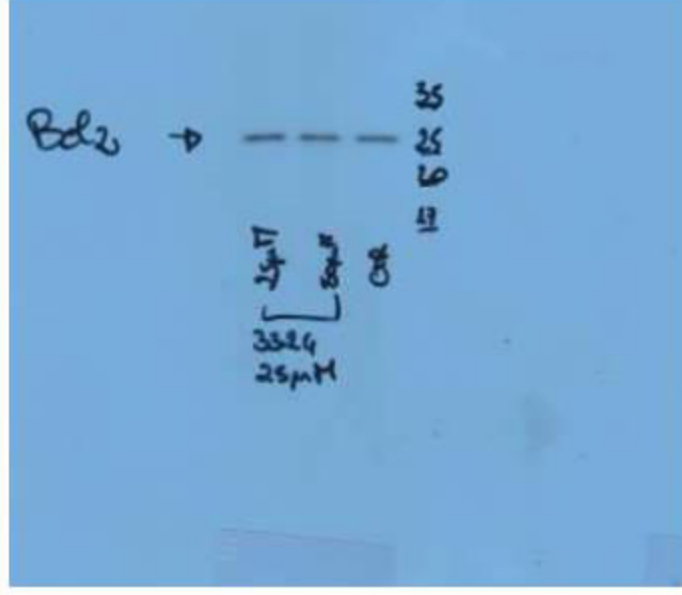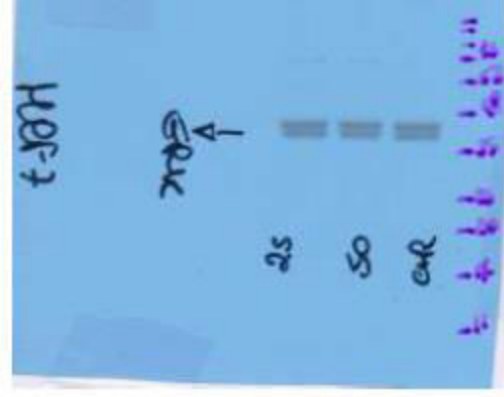

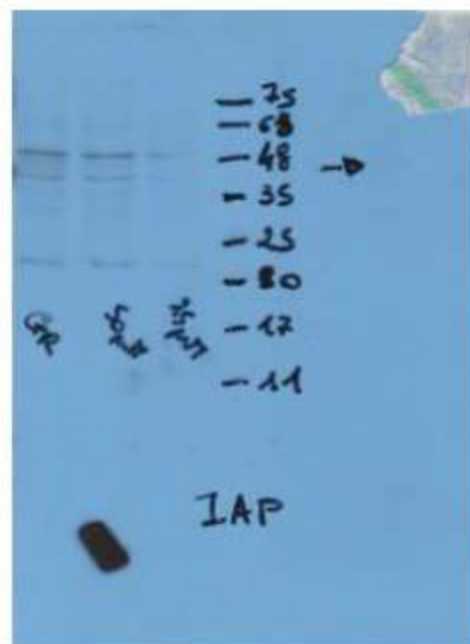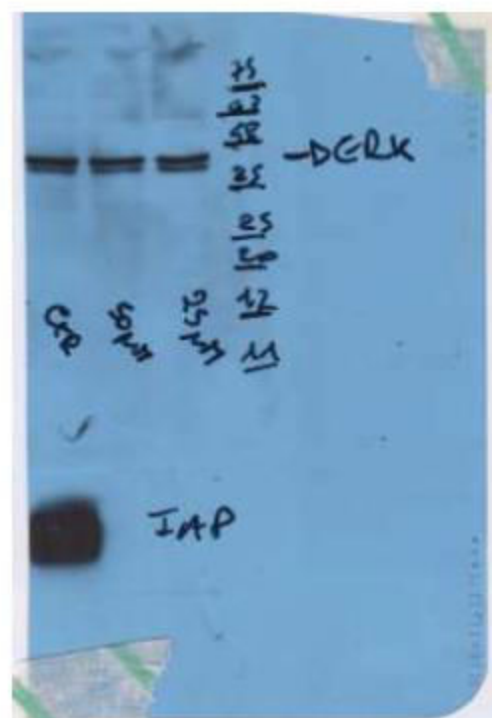

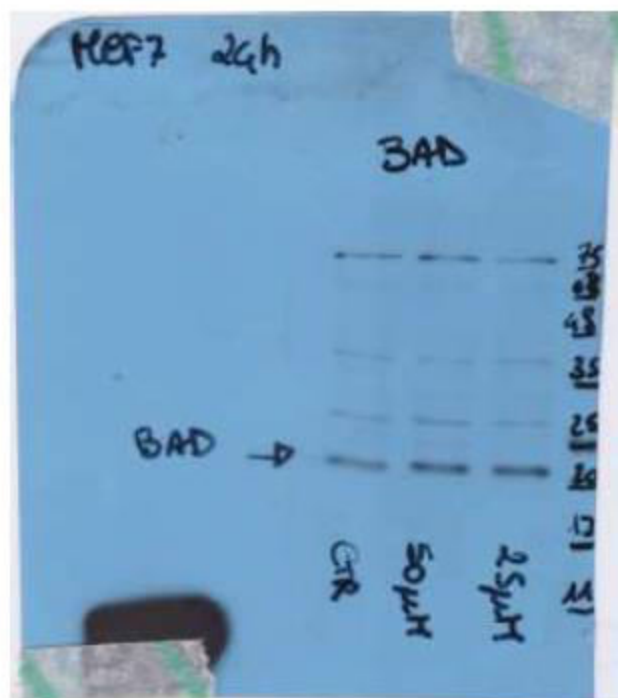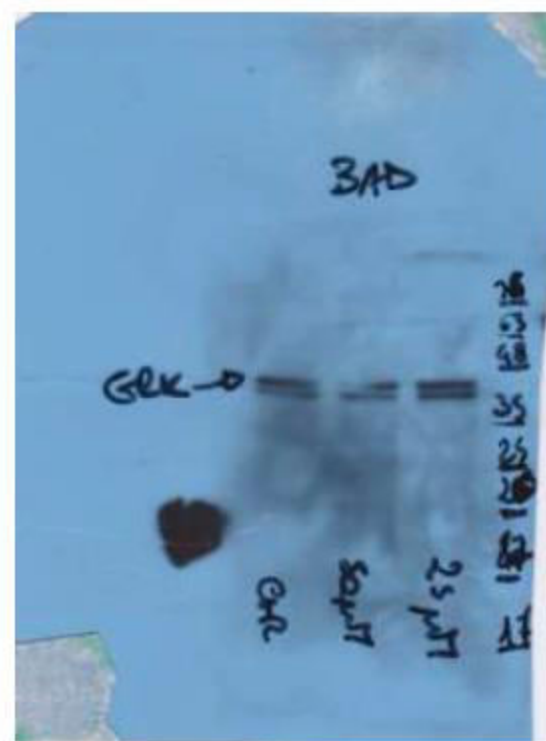

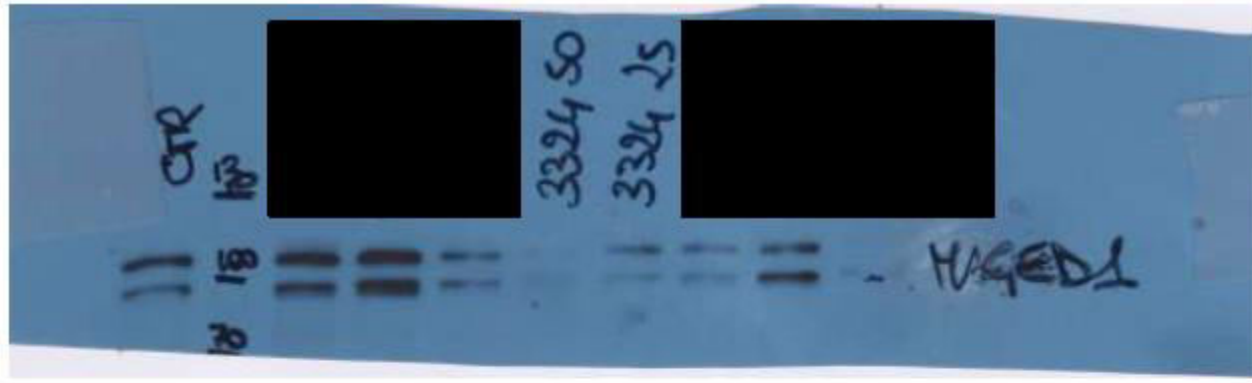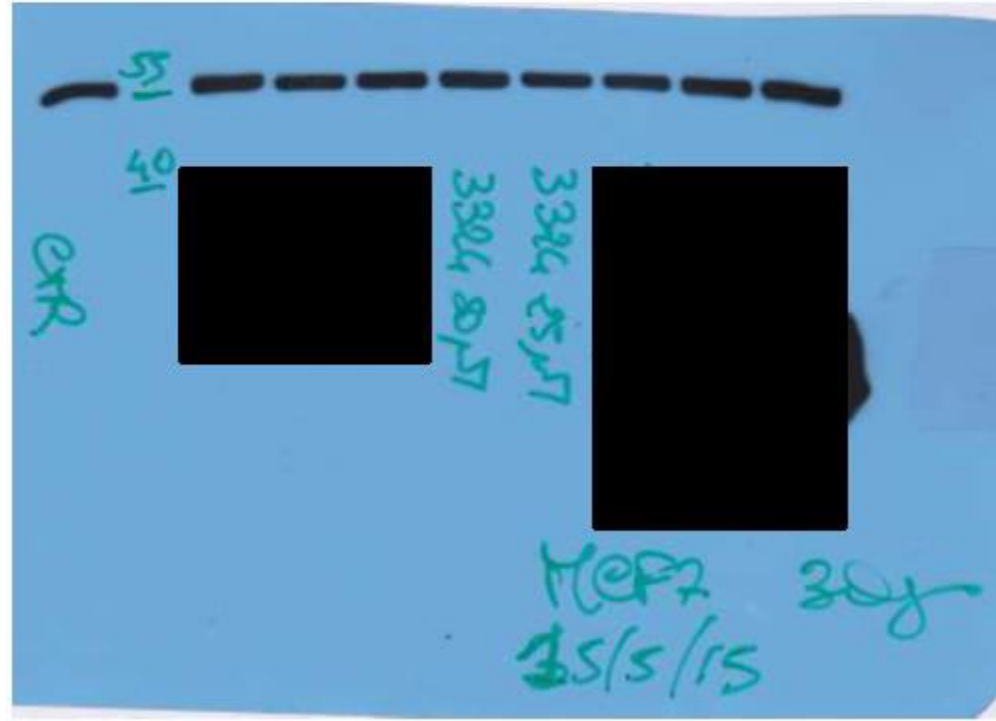



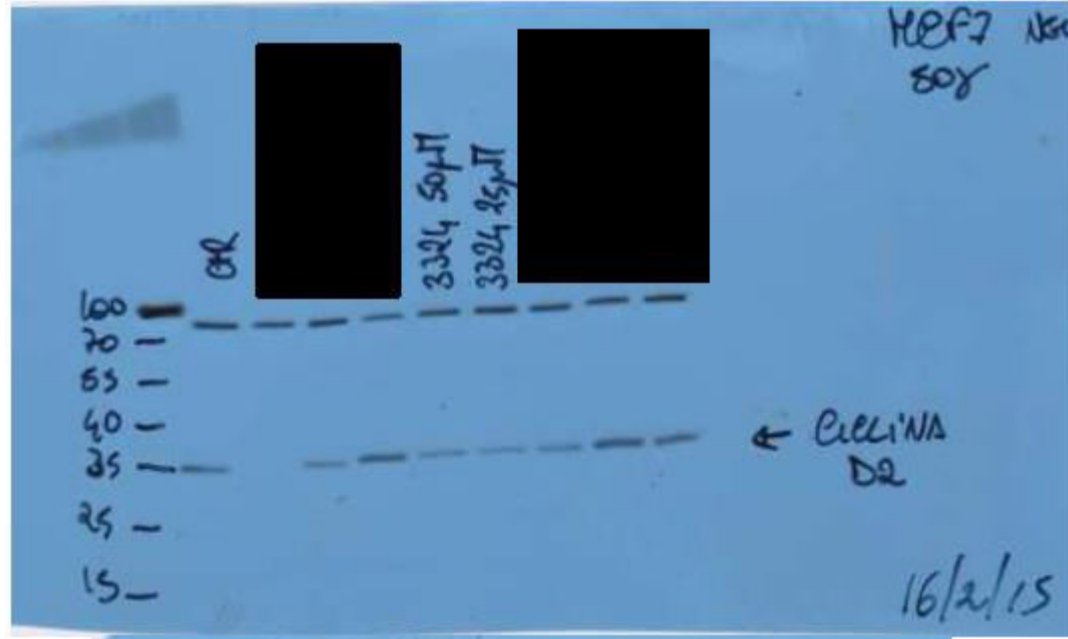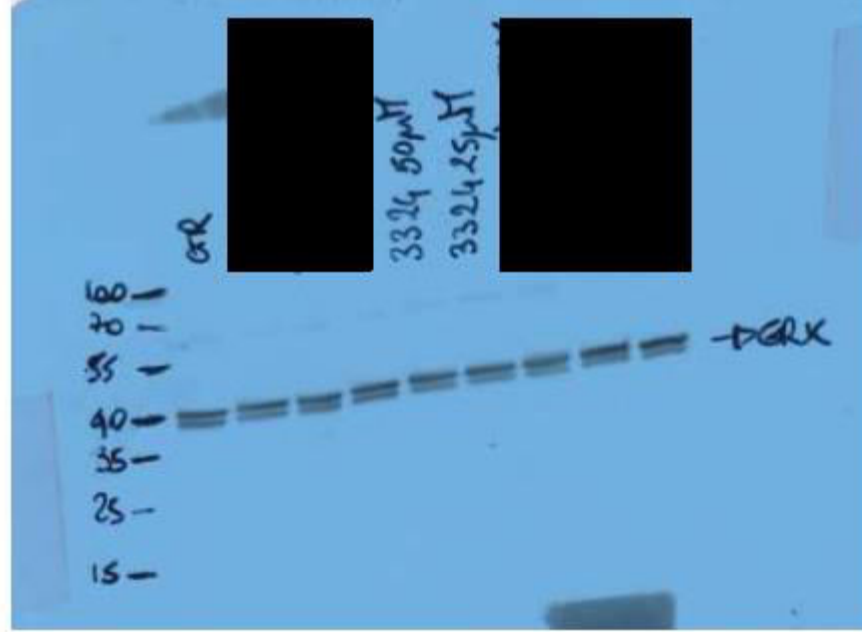

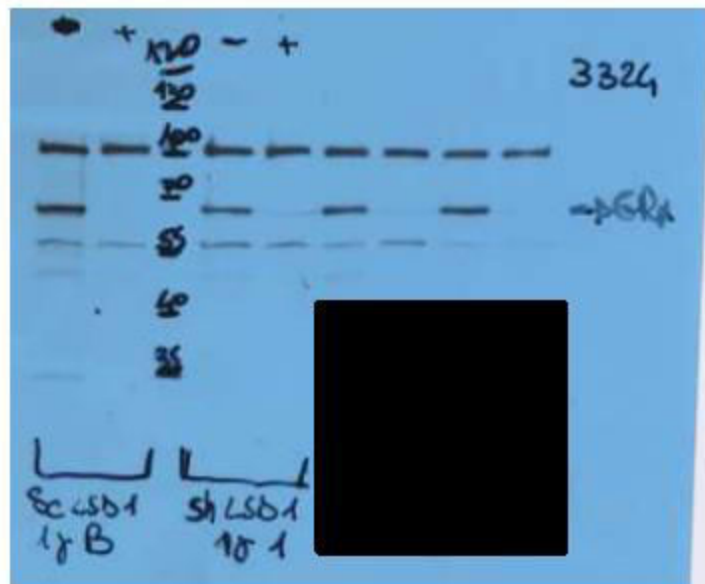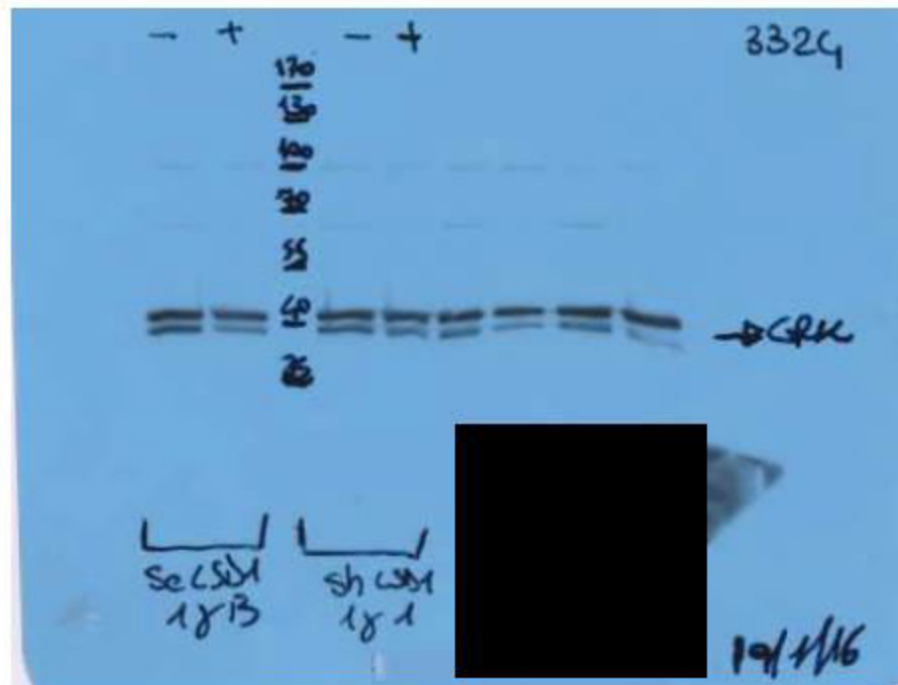

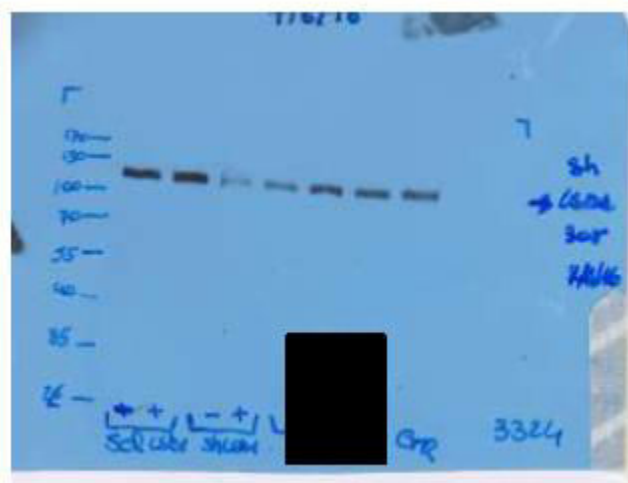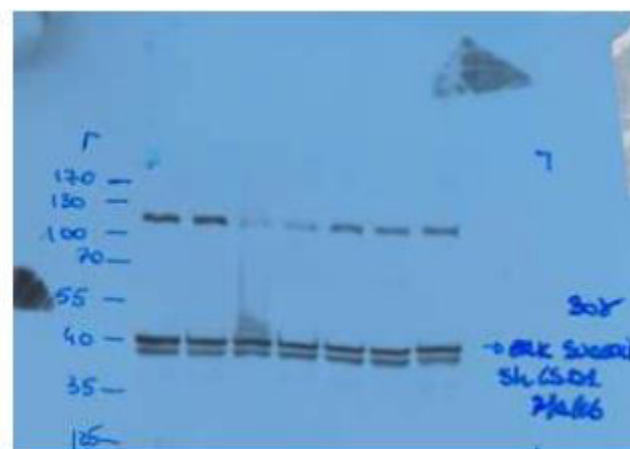

Supplement: s1 [file s1]
